# Supplementary material for: Association of Triglyceride-Glucose Index and Its Obesity-Adjusted Derivatives with Psoriasis: Findings from a Cross-Sectional Chinese study
Source: Research Square preprint supplement (doi:10.21203/rs.3.rs-7988743/v1), 2025-11-14
Supplement: Supplementary file 1 [file df8f441e9892d1d77632d1e7.docx]

| Characteristic | Q1 (n=828) | Q2 (n=829) | Q3 (n=829) | Q4 (n=828) |
| --- | --- | --- | --- | --- |
| **Demographics & Lifestyle** |  |  |  |  |
| Age, years | 45.8 ± 7.7 | 48.5 ± 8.3 | 50.8 ± 8.7 | 52.5 ± 9.1 |
| Male, n (%) | 350 (42.3) | 425 (51.3) | 465 (56.1) | 472 (57.0) |
| **Smoking status, n (%)** |  |  |  |  |
| Never | 600 (72.5) | 520 (62.7) | 450 (54.3) | 324 (39.1) |
| Former | 100 (12.1) | 125 (15.1) | 145 (17.5) | 148 (17.9) |
| Current | 128 (15.5) | 184 (22.2) | 234 (28.2) | 356 (43.0) |
| **Alcohol consumption, n (%)** |  |  |  |  |
| Yes | 300 (36.2) | 380 (45.8) | 420 (50.7) | 443 (53.5) |
| No | 528 (63.8) | 449 (54.2) | 409 (49.3) | 385 (46.5) |
| **Anthropometrics** |  |  |  |  |
| Body Mass Index, kg/m² | 23.5 ± 2.3 | 24.5 ± 2.5 | 25.4 ± 2.7 | 26.5 ± 2.8 |
| Waist Circumference, cm | 82.9 ± 5.9 | 85.2 ± 6.3 | 87.8 ± 6.8 | 90.8 ± 7.1 |
| Systolic BP, mmHg | 122.1 ± 10.1 | 126.3 ± 11.0 | 129.5 ± 11.5 | 133.2 ± 11.9 |
| Diastolic BP, mmHg | 75.8 ± 6.9 | 77.5 ± 7.2 | 79.1 ± 7.5 | 80.8 ± 7.8 |
| **Laboratory Parameters** |  |  |  |  |
| Fasting Glucose, mmol/L | 5.1 ± 0.6 | 5.3 ± 0.6 | 5.6 ± 0.6 | 6.0 ± 0.7 |
| Triglycerides, mmol/L | 1.64 ± 0.26 | 1.73 ± 0.28 | 1.85 ± 0.31 | 2.03 ± 0.33 |
| LDL-C, mmol/L | 2.8 ± 0.3 | 2.9 ± 0.4 | 3.1 ± 0.4 | 3.2 ± 0.4 |
| HDL-C, mmol/L | 1.46 ± 0.23 | 1.40 ± 0.24 | 1.32 ± 0.25 | 1.25 ± 0.26 |
| Hs-CRP, mg/L | 1.2 ± 0.8 | 1.7 ± 1.0 | 2.4 ± 1.2 | 3.2 ± 1.3 |
| eGFR, mL/min/1.73 m² | 104.4 ± 11.3 | 102.0 ± 11.2 | 99.8 ± 11.1 | 97.5 ± 10.9 |
| **TyG-Derived Indices** |  |  |  |  |
| TyG Index | 8.5 ± 0.2 | 8.8 ± 0.2 | 9.1 ± 0.2 | 9.4 ± 0.3 |
| TyG-BMI | 196.2 ± 20.5 | 215.6 ± 22.8 | 232.1 ± 25.4 | 249.3 ± 27.1 |
| TyG-WC | 694.8 ± 54.6 | 749.8 ± 62.7 | 798.5 ± 69.3 | 860.1 ± 72.9 |
| Psoriasis, n (%) | 200 (24.2) | 350 (42.2) | 450 (54.3) | 560 (67.6) |
